# Supplementary material for: Autocatalytic synthesis of molecular-bridged silica aerogels with excellent absorption and super elasticity
Source: Royal Society of Chemistry journal article supplement (doi:10.1039/c5ra19776g), 2015-01-01
Supplement: c5ra19776g1.pdf [file c5ra19776g1.pdf]

## Supporting Information

### Autocatalytic synthesis of molecular-bridged silica aerogels with excellent absorption and super elasticity

Yong Wei,<sup>a,b,#</sup> Jin Wang,<sup>b,#</sup> Yulu Zhang, Lin Wang,<sup>\*a</sup> Xuotong Zhang<sup>\*b,c</sup>

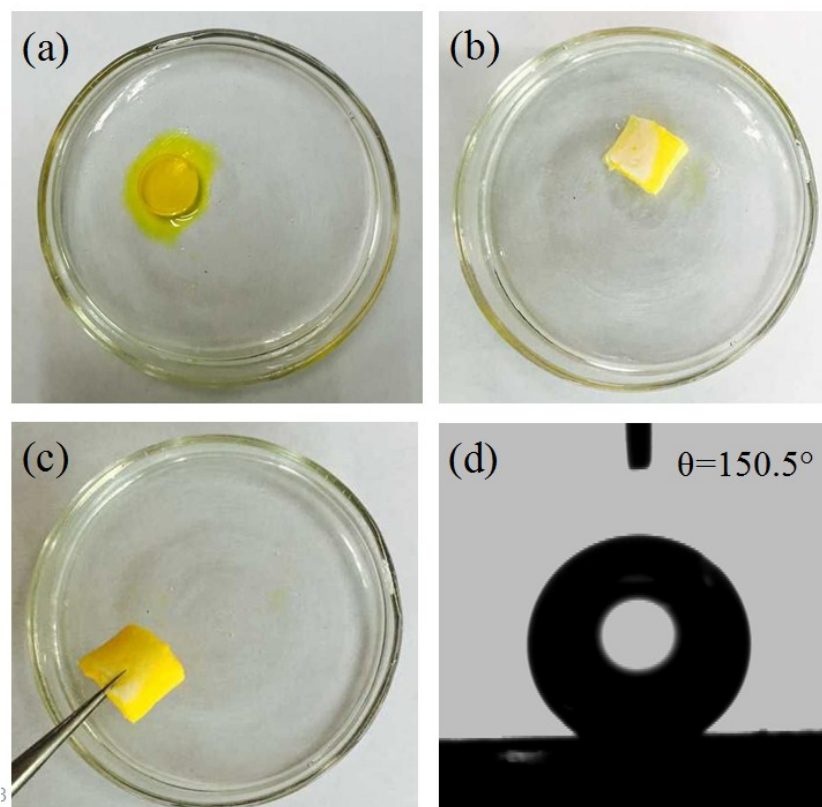

**Fig. S1** (a-c) photo images of the MBSAs been used to absorb hexane (dyed with oil-soluble dyes), and (d) water contact angle on the surface of MBSAs (sample with density of  $0.0702\text{g cm}^{-3}$ )

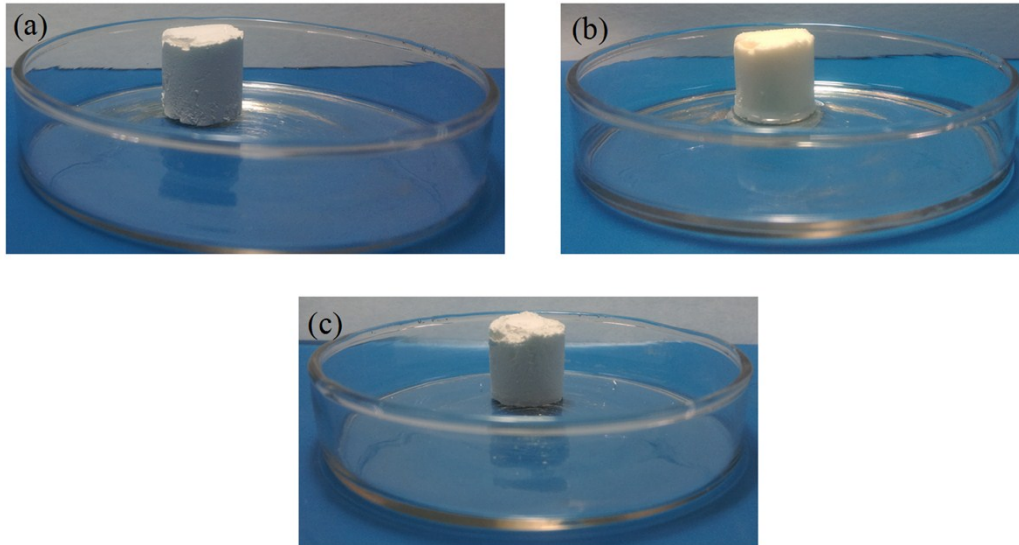

**Fig. S2** Photographs showing various stages of adsorption and desorption of hexane from the aerogel (sample with density of  $0.0702\text{ g cm}^{-3}$ ). (a) before absorption, (b) immediately after absorption,  $t \approx 5$  min, (c) after desorption,  $t \approx 15$  min (heating at  $80$   $^{\circ}\text{C}$ ).
